1 **Article category:** original article

2

3 **Title:** Strain patterns with ultrasound for improved assessment of abdominal aortic aneurysm vessel  
4 wall biomechanics

5

6 **Authors:**

7 Ulver S. Lorenzen (1, 2), Marta I. Bracco (3, 4), Alexander H. Zielinski (1), Magdalena Broda (1),  
8 Stéphane Avril (4), Laurence Rouet (2), Jonas P. Eiberg (1, 2, 5), the COACH Research  
9 Collaborative (\*)

10

11 **Affiliations:**

12 1) Department of Vascular Surgery, Copenhagen University Hospital - Rigshospitalet,  
13 Copenhagen, Denmark

14 2) Department of Clinical Medicine, Faculty of Health and Medical Sciences, University of  
15 Copenhagen, Denmark

16 3) Philips Health Technology Innovation, Paris, France

17 4) Centre for Biomedical and Healthcare Engineering, Soft Tissue BIOMechanics (STBio),  
18 MINES Saint-Étienne, Campus of Saint-Étienne, Saint-Priest-en-Jarez, France

19 5) Copenhagen Academy for Medical Education and Simulation (CAMES), the Capital  
20 Region, Copenhagen, Denmark

21 (\*) Members of the Copenhagen Aneurysm Cohort (COACH) Research Collaborative are listed at  
22 the end of the paper

23

24 **Corresponding Author**

25 Ulver Spangsberg Lorenzen,  
26 Blegdamsvej 9, 2100 Copenhagen, Denmark  
27 E-mail: [ulver.spangsberg.lorenzen@regionh.dk](mailto:ulver.spangsberg.lorenzen@regionh.dk)

28

29 **Word count:** 3380

30 **ABSTRACT**

31 ***Background***

32 Abdominal aortic aneurysms (AAAs) are an important cause of death. Small AAAs are surveyed with  
33 ultrasound (US) until a defined diameter threshold, often triggering a CT scan and surgical repair.  
34 Nevertheless, 5-10 % of AAA ruptures are below threshold, and some large AAAs never rupture.  
35 AAA wall biomechanics may reveal vessel wall degradation with potential for patient-centred risk  
36 assessment. This clinical study investigated AAA vessel wall biomechanics and deformation patterns,  
37 including reproducibility.

38 ***Methods***

39 In 50 patients with AAA, 183 video clips were recorded by two sonographers. Prototype software  
40 extracted AAA vessel wall principal strain characteristics and patterns. Functional principal  
41 component analysis (FPCA) derived strain pattern statistics.

42 ***Results***

43 Strain patterns demonstrated reduced AAA wall strains close to the spine. The strain pattern  
44 ‘topography’ (i.e., curve phases or ‘peaks’ and ‘valleys’) had a 3.9 times lower variance than simple  
45 numeric assessment of strain amplitudes, which allowed for clustering in two groups with FPCA. A  
46 high mean reproducibility of these clusters of 87.6 % was found. Median pulse pressure-corrected  
47 mean principal strain (PPPS) was 0.038 %/mmHg (interquartile range: 0.029 to 0.051 %/mmHg) with  
48 no correlation to AAA size (Spearman’s  $\rho = 0.02$ , FDR-P = 0.15). Inter-operator reproducibility of  
49 PPPS was poor (limits of agreement:  $\pm 0.031$  %/mmHg).

50 ***Discussion***

51 Strain patterns challenge previous numeric stiffness measures based on AP-diameter and are  
52 reproducible for clustering. This study’s PPPS aligned with prior findings, although clinical  
53 reproducibility was poor. In contrast, US-based strain patterns hold promising potential to enhance  
54 AAA risk assessment beyond traditional diameter-based metrics.

55 **KEYWORDS:** abdominal aortic aneurysms, ultrasound, biomechanics, strain

## 56 INTRODUCTION

57 Abdominal aortic aneurysms (AAA) are characterised by progressive vessel wall weakening, with a  
58 prevalence of about 2-3 % among 65-year-old men (1, 2). This weakening can lead to rupture with a  
59 mortality of 75-80 % (3). In contrast, the mortality associated with prophylactic AAA repair, while  
60 comparatively low, remains non-negligible, ranging from 1-3 % (4). Overall, AAA is estimated as  
61 the 10<sup>th</sup>-15<sup>th</sup> most common cause of death among late middle-aged men (5, 6). Repair is typically  
62 considered for large AAAs, assessed by diameter, when the risk of rupture exceeds the procedure-  
63 related risk. Conversely, small AAAs are routinely monitored with ultrasound (US) surveillance (7-  
64 10). However, using diameter as the sole parameter for risk assessment may be flawed since 5-10 %  
65 of all AAAs ruptures occur below the threshold, while other AAAs grow large without rupturing (11-  
66 16). Declining rupture rates, attributed to AAA screening programs and smoking cessation (2, 17),  
67 combined with a potential need for screening more senior citizens and patients with AAA ectasia  
68 (18), may place a capacity constraint on AAA surveillance programs. Thus, a more personalised  
69 approach is needed to detect subthreshold AAAs at risk and prevent overtreatment of low-risk AAAs  
70 above the threshold.

71 In search of AAA risk factors beyond diameter, biomechanical properties, especially global stiffness  
72 and elastic modulus of the AAA vessel wall, have been studied with US. Both are typically calculated  
73 based on the anterior-posterior (AP) diameter dilatation within a cardiac cycle, normalised for blood  
74 pressure (19-24). These studies correlated the global stiffness and elastic modulus with AAA  
75 diameter, and the results ranged from negligible (19, 24) to moderate correlation (21, 23). Similarly,  
76 studies have investigated the correlation between biomechanical properties and future growth (23,  
77 24), rupture, or repair (20-22). Despite initially promising results, the evidence remains contradictory  
78 and does not consistently align with findings from in vitro studies (25).

79 Further work has focused on localised AAA wall strains, calculated by mapping the AAA wall motion  
80 with time-resolved two-dimensional (2D-US) (26, 27) and three-dimensional US (3D-US) (28-32).  
81 Local strains are defined by deformation of hypothetical small segments distributed throughout the  
82 AAA vessel wall. This allows for the computation of an entire grid of local AAA vessel wall  
83 deformation across the cardiac cycle, or a “strain map”. One study found that such strain measures  
84 are independent of AAA size and have a non-linear correlation to AAA growth, suggesting that  
85 localised AAA wall strains can potentially improve the current diameter-based AAA risk prediction  
86 (27).

87 Thus, progress has been made from simple global stiffness and elastic modulus solely based on  
88 ultrasound AP-diameter variations to full strain maps. However, only one study (27) has used these  
89 new biomechanical markers in AAA risk prediction and did not investigate clinical reproducibility.  
90 Also, all current studies of localised wall strains reduce the full AAA vessel wall deformation grid,  
91 or strain map, to “single parameter characterisations”. Such characterisations include numeric mean  
92 strain, peak strain, and heterogeneity index, which all can be calculated from the strain values of the  
93 entire grid. These numeric characterisations, while ingenious, can hide nuances that can only be  
94 obtained by considering the complete ‘topography’ of a full AAA strain map.

95 This paper aimed to measure and categorise localised AAA strain maps in a clinical setting using  
96 outpatient-based 2D-US acquisitions and a prototype software tool based on a fast strain-mapping  
97 approach and to investigate the method’s reproducibility.

98

## 99 **MATERIALS & METHODS**

### 100 *Study design*

101 A prospective single-centre, observational proof-of-concept study

102

### 103 *Patients*

104 Fifty patients from the Copenhagen Aortic CoHort (COACH) were included. COACH is a  
105 prospective cohort of patients with AAAs with diameters above 30 mm and monitored with research-  
106 orientated US surveillance (33). Enrolment in COACH relies on research staff and equipment  
107 availability. Exclusion criteria were aorto-iliac aneurysms; suprarenal aortic aneurysms; prior aortic  
108 or iliac artery repair; non-compliance with surveillance; or inability to provide informed consent. US  
109 acquisitions were systematically collected and stored.

110

## 111 **METHODS**

### 112 **US image acquisition**

113 Two US operators independently and non-consecutively recorded two 10-second cross-sectional 2D-  
114 US time-resolved B-mode sequences (video clips called “cineloops”) of the AAA at the maximal AP-  
115 diameter during breath-holds using an identical US-system (Epiq Elite US system and C5-1  
116 transducer, Philips Medical systems, Bothell, WA, USA). Thus, for each patient, four cineloops were  
117 planned (two recordings × two operators). Acquisitions were subsequently transferred to a core lab,  
118 where two readers (USL and MIB) mutually and independently conducted the image post-processing

119 in a randomised order via randomised.org, using a prototype software (Philips Health Technology  
120 innovation). The image quality of every cine loop was evaluated and graded by a clinical expert reader  
121 (USL). Cine loops of poor image quality were not used for further analysis.

122

## 123 **Strain**

124 Strains are the percentage deformation of the AAA vessel wall when force is applied to it, e.g., by the  
125 blood pressure during the heart cycle. When overlaying a grid on the AAA vessel wall, principal  
126 strain is the largest deformation value in any direction (called the “principal direction”). Higher values  
127 indicate softer tissues, and lower values indicate stiffer tissues. Principal strain can then be projected  
128 onto two main directions of movement along the AAA vessel wall: circumferential (stretch or  
129 compression) or radial (thickening or thinning); see Figure S1.

130

## 131 **Image post-processing**

132 The image post-processing is described in detail in previous work (26), with the notable difference  
133 that the present study includes principal strain in addition to circumferential and radial strain. The  
134 process can be summarised as a 3-step procedure: 1) manual segmentation and automatic tracking;  
135 2) automatic strain map generation; and 3) strain pattern extraction.

136

### 137 *1) Manual segmentation and automatic tracking*

138 Tracking points were manually positioned at the initial frame of the cine loop. This was done  
139 circumferentially at the interface between the aneurysm wall and lumen (Figure 1B). Subsequently,  
140 an automated speckle-tracking process was employed based on image gradients within an automatic  
141 region of interest (Figure 1C).

142

### 143 *2) Automatic strain map generation*

144 A deformation grid was computed based on the tracking procedure, and from this, strain over the  
145 cardiac cycle – from end diastole to peak systole – was directly calculated. The resulting strain data  
146 were superimposed on the cine loop. This generated a comprehensive strain map (Figure 1D)  
147 illustrating different zones of AAA strain, expressed as percentage changes over time. Results from  
148 all cardiac cycles were then averaged.

149

### 150 *3) Strain pattern extraction and normalisation*

151 The obtained strain maps contain local information along an irregular vessel wall. To enable inter-  
152 case comparisons of strain maps, strain values were radially averaged for each degree of the AAA  
153 circumference with  $0^\circ$  defined as the bottom of the strain map (towards the spine), see Figure 1E.  
154 Thus, the total information of an AAA strain map is summarised as a polar plot, henceforth designated  
155 the “strain pattern”, see Figure 1F (where the black circle represents the reference null strain). Strain  
156 patterns were then smoothed to reduce sensitivity to noise.

157

## 158 **Data analysis and statistics**

### 159 *Functional data analysis of strain patterns*

160 To analyse strain patterns without reducing them to single parameter characterisations, functional  
161 data analysis (FDA) with alignment was performed (34). Alignment is the process of elastically  
162 synchronizing (or “warping”) functional data sets to a common reference, enabling comparative  
163 analysis and inference across patients. The mean strain pattern was calculated on smoothed and  
164 elastically aligned strain patterns to reduce noise and account for minor scan variations (e.g., in  
165 insonation angles). Further, using function principal component analysis (FPCA), the strain patterns  
166 were decomposed into their principal modes of variations (PMV) with associated scores for each  
167 cineloop. The scores for each PMV was analysed for correlation with AAA size using Spearman’s  
168 rank correlation. A positive or negative coefficient of 0 to 0.3 was considered weak correlation, 0.3  
169 to 0.5 low, 0.5 to 0.7 moderate, 0.7 to 0.9 high, and 0.9 to 1.0 very high (35). P-values were corrected  
170 using the Benjamini-Hochberg false discovery rate (FDR) procedure. Only FDR-P-values  $< 0.05$   
171 were considered statistically significant.

172

### 173 *Clustering*

174 Subsequently, spectral consensus clustering (36, 37) was then used to split the cineloops into an  
175 optimal number of clusters based on the PMV scores.

176

### 177 *Single parameter strain characterisations*

178 As described in other work on strain mapping (27-29), single numeric parameter strain  
179 characterisations can be calculated from the end-diastolic to peak-systolic strain based on the  
180 principal strains across the vessel wall: mean strain; pulse pressure-normalised mean strain (PPPS);  
181 peak strain; heterogeneity index, i.e., the ratio of the SD of wall strain to the mean wall strain; and  
182 local strain ratio, i.e., the ratio between the peak strain and mean strain.

183

184 Single parameter strain characteristics were summarised across all patients with frequency-weighted  
185 medians and interquartile ranges (IQR), due to non-normality. All single parameter strain  
186 characteristics were analysed for correlation with AAA size using Spearman’s rank correlation  
187 similarly to the PMVs.

188

### 189 *Reproducibility*

190 For strain pattern clusters, the “cluster reproducibility” was calculated, which was defined as the  
191 percentage of an individual patient’s four cine-loops that belong to the majority (or tie for majority)  
192 cluster (e.g., three out of four scans within the same cluster equals 75 %). By aligning all of a patient’s  
193 scans to each other (within-patient alignment), amplitude and phase variations for each patient could  
194 be extracted. These were averaged across patients for an overall amplitude-phase variation ratio.

195 For single parameter characterisations, Bland-Altman limits of agreement (LoA) on inter-reader  
196 comparisons were calculated, comparing readers USL and MIB on the same cine-loops. The LoA were  
197 quantile-based, due to non-normality, and were converted into a range of variance (RoV, i.e. half the  
198 quantile distance) and displayed as a percentage of the median. To calculate LoA for inter-operator  
199 considerations, a linear mixed-effects model was utilised, accounting for multiple acquisitions by the  
200 same operator.

201

202 All statistical analyses described above were performed in R version 4.3.3 using RStudio version  
203 2023.12.1 build 402 (Posit software, PBC, Boston MA, USA). The packages: Hmisc, mgcv, fdastrv, fdastrv,  
204 fdapace, and M3C were used for weighted statistics, strain pattern smoothing, alignment, FPCA, and  
205 clustering, respectively.

206

### 207 **Ethics**

208 This study was approved by the The Regional Ethics Committee of the Capital Region of Denmark  
209 (protocol no. H-20001116).

210

### 211 **RESULTS**

212 The present study utilised a prototype US tool to estimate AAA vessel wall strains from 183 clinical  
213 US cine-loops acquired on 50 AAA patients scanned by two independent operators. The frequency-

214 weighted median AAA size with US was 45.1 mm (weighted IQR: 41.7 to 49.4 mm), and all AAA's  
215 were asymptomatic. Further demographics can be seen in Table 1.

216

### 217 *Strain patterns*

218 The strain patterns were extracted as the strain values at each degree on a circle and illustrated as  
219 polar plots in Figure 2. The mean principal strain pattern behaved as a triphasic, though almost  
220 quadriphasic, curve with three definitive local maxima and a plateau. At the posterior wall, two  
221 definitive peaks (3.5 % and 3.2 %) were detected on each side of the spine (320° and 60°). At the  
222 anterior wall, one definitive peak (2.1 % at 244°) was identified at the patient's right. In order words,  
223 AAA principal strain patterns reveal that, on average, the vessel wall was the softest bilaterally  
224 adjacent to the spine and on the right side of the anterior wall while demonstrating maximal stiffness  
225 directly over the spine. The mean strain patterns were generally consistent across the two operators.  
226 Results for circumferential and radial strain can be seen in Figure S2 and Table S1.

227

228 Three of the eight PMVs extracted with FPCA (see Figure S3) showed evidence of a statistically  
229 significant correlation with AAA size (Table 2). The PMV#2 had a  $\rho$  of -0.24 (FDR-P = 0.005),  
230 PMV#4 had a  $\rho$  of -0.20 (FDR-P = 0.02), and PMV#8 had a  $\rho$  of 0.29 (FDR-P < 0.001). The PMVs  
231 with the most negative and positive correlations to AAA size, PMV#2 and #8, are illustrated in Figure  
232 3 alongside scatterplots of their correlations to AAA size. From this, it can be inferred that large  
233 AAAs tend towards more strain at the anterior wall with two peaks to the right and left side, while  
234 small AAAs tend towards less strain at the anterior wall, but retaining strain peaks in relation to the  
235 spine. Also, these two PMVs show that large AAAs tend to have less strain at the lateral walls, while  
236 small have more.

237

### 238 *Clustering*

239 With spectral consensus clustering, the strain patterns from all cineloops were split into an optimum  
240 of two clusters by the algorithm (P = 0.04), the aligned means of which can be seen in Figure 4 (and  
241 Figure S4). Generally, the clusters' aligned mean strain patterns were similar in shape, but differed  
242 in the amplitudes of the shape.

243

### 244 *Single parameter characterisations*



245 Single parameter characterisations are summarised in Table 3. The pulse pressure-corrected mean  
246 principal strain (PPPS) displayed a weighted median of 0.038 %/mmHg (IQR: 0.029 to 0.051  
247 %/mmHg). As also seen in Table 3, none of the single parameter characterisations showed evidence  
248 of correlation with AAA size, indicating that these values contain additional information to AAA  
249 diameter.

250

### 251 *Reproducibility*

252 Mean cluster reproducibility across patients were 86.2 % (95 % CI: 81.4 % to 91.1 %) for principal  
253 strain (range of possible values with two clusters and four scans pr. patient is 50-100 %, see also  
254 Figure S5). From the alignment procedure, amplitude and phase variations were extracted.  
255 Amplitude-phase variance ratios were calculated for principal strain and was 3.9 (95 % CI: 3.3 to 4.7)  
256 on average. Thus, the phases of the strain patterns were vastly more reproducible than their specific  
257 amplitudes. Example cases with high amplitude-phase variance ratios can be seen in Figure S6.

258

259 Bland-Altman statistics comparing two readers post-processing the same images were converted to  
260 RoVs. The PPPS' inter-reader RoV was low at 0.007 %/mmHg, which translated to 20 % of the  
261 median value, indicating good reproducibility of the post-processing. The RoVs for other strain  
262 parameters were similar, ranging from 14 % for local strain ratio to 22 % for peak strain. Based on a  
263 linear mixed-effects model, inter-operator LoA were calculated; for PPPS this was quite high at  
264  $\pm 0.031$  %/mmHg (82 % of the median). Further reproducibility of principal strain single parameter  
265 characterisations can be seen in Table 4. The principal strain was the most reproducible method  
266 compared to circumferential and radial strain in Table S3.

267

268

## 269 **DISCUSSION**

270 Vessel wall biomechanics have been explored to discover future AAA risk factors. Global stiffness  
271 and elastic modulus based on AP-diameter variations seem inconclusive (20, 22, 24), and this study  
272 presents an approach using conventional 2D-US to detect local strain changes along the entire AAA  
273 circumference.

274 When measuring the strain on 183 cine-loops in 50 patients, notable variations in the localised strain  
275 were detected, indicating that 'global stiffness' and elastic modulus, based on AP-diameter variations,

276 seem oversimplified. These ‘topographic’ variations were closely related to the spine, suggesting that  
277 the surrounding tissue has a profound, and perhaps overlooked, impact on AAA wall biomechanics.  
278 For ease of interpretation, earlier works have reduced these localised variations (called ‘strain  
279 patterns’ in the present paper) into numeric parameters as a simplified description of the AAA vessel  
280 wall motion (26-32). Of these, one (27) has investigated strain mapping from conventional 2D-US,  
281 and have reduced the strain patterns to pulse pressure-corrected mean principal strains ( $\overline{\epsilon_{p+}}/PP$ , here  
282 called PPPS), finding evidence of a connection between intermediate values at baseline and future  
283 AAA growth. Interestingly, they found a mean PPPS of 0.034 %/mmHg in 113 AAA patients, which  
284 is very close to the weighted median in the present study (0.038 %/mmHg). This similarity in results  
285 implies that the measured phenomenon reflects genuine deformation characteristics of the AAA  
286 vessel wall.

287 From the current work on strain patterns, the shape, or ‘topography’, of the AAA wall motion curve  
288 is quite reliable and easy to reproduce across operators. An example is the almost four-fold decrease  
289 in variance when looking at strain pattern phases rather than amplitudes. This is particularly important  
290 because, even though a few measures (e.g. heterogeneity index) superfluously describe characteristics  
291 of local variations, all characteristics described in earlier work entirely ignore positions of strain  
292 variations along the AAA vessel wall. When considering these shapes, clustering based on strain  
293 patterns becomes feasible and reproducible, as illustrated by the 86 % cluster reproducibility for  
294 principal strain, meaning that an average of about 3.5 out of 4 cine-loops belong to the same cluster.  
295 Strain pattern clusters are a data-driven way to stratify AAAs. The clusters may reflect important  
296 differences in wall characteristics; in this initial study, about half of the patients exhibited stiffer  
297 aneurysms. Theoretically, these clusters could be correlated with AAA growth and even rupture.

298 Compared to the reproducibility of strain pattern clusters, Zottola et al. (27) investigated the  
299 reproducibility of US-generated AAA vessel wall motion characteristics. On the log scale, they  
300 reported an LoA of PPPS that can be translated into an RoV of 15.6 % – slightly better than the RoV  
301 of 20 % found in the present study. A notable difference between these methods, is that this study  
302 averages strains across all cycles of a 10-second cine-loop, while Zottola et al. selected a single cycle  
303 from each cine-loop. Both Zottola and this study reported inter-reader reproducibility. However, the  
304 present study is the first to include inter-operator reproducibility, which is essential if the method  
305 should play a role in risk assessment in future AAA surveillance. Unfortunately, reproducibility was  
306 challenging for all the investigated parameters, with measurement errors as large as the actually  
307 measured values. While this does not invalidate correlation and follow-up studies’ ability to detect

308 essential associations, the transfer into clinical practice on an individual patient level becomes  
309 problematic. The reproducibility issue may have plagued early studies based on AP-diameter  
310 variations (19-24).

311

312 Many factors can affect strain measurements, and reproducibility issues were expected. Common  
313 ultrasound challenges such as adipose tissue, patient breathing, and bowel movements may  
314 additionally have an impact. Strain measurement can theoretically be further hampered by operator-  
315 related issues such as insonation angle, cross-section deviations, transducer rotation, and even  
316 transducer pressure (38-40). Unlike in diameter measurement, patient factors such as heart rate and  
317 blood pressure may also limit strain measurements. Despite this, strain patterns appear markedly  
318 stable, and their relation to AAA size suggests that AAA strain patterns should be investigated as a  
319 viable supplement for a more patient-centred AAA risk stratification. It is conceivable that the  
320 progression and rupture of AAA are influenced not by the overall AAA strain but more by localised  
321 vessel wall weakness, or ‘weak spots’, and the dynamic interactions with adjacent tissue structures.  
322 The surrounding tissue must be essential in restricting AAA wall motion (38), which should also be  
323 considered.

324

### 325 *Limitations*

326 Further studies with follow-up data should determine the added clinical value of strain pattern  
327 analysis and AAA biomechanics for improved AAA risk prediction. Larger cross-sectional studies  
328 could provide insights into a correlation between biomechanical measures and patient characteristics:  
329 demographics, diabetes, hypertension, medication and sex.

330 The use of repeated measurements mitigates the impact of the relatively small size of this study;  
331 however, because of repeated measures and FDA, a preceding power calculation was unfeasible.  
332 Therefore, these results must be evaluated considering a potential Type II error.

333

### 334 *Current and future work*

335 With the reservation that this is not a follow-up study, this study suggests that, as the AAAs grow,  
336 strain pattern changes may occur at the anterior AAA wall, while the posterior wall strain is constant.  
337 The lateral wall strains also showed relation to AAA diameter, though these locations are subject to  
338 poorer image quality. Further investigation into these correlations will be an important feature in  
339 future studies.

340 *Conclusion*

341 This proof-of-concept study presents the first experiences for detecting, visualising, and quantifying  
342 circumferential AAA vessel wall strain patterns based on conventional US scanning. Interestingly,  
343 deformation along the circumference of the aneurysm wall was heterogenous, specifically for the wall  
344 close to the spine. These results open the possibility for prospective studies investigating not just  
345 global, but local strain as a risk factor for growth.

346 **ACKNOWLEDGEMENTS**

347 Members of the Copenhagen Aneurysms Cohort (COACH) Research Collaborative that are not  
348 authors on this paper, but who collected data and/or developed the AAA tools, and/or analysed and  
349 interpreted data, and/or developed study ideas and design:

350 Cecile Dufour; Qasam M. Ghulam

351

352 This study did not obtain specific funding from public, commercial, or not-for-profit sectors.

353

354 **CONFLICTS OF INTEREST**

355 **Jonas Eiberg** has received a research grant, speaker honorarium and sits on an advisory board for  
356 Philips Ultrasound.

357 **Laurence Rouet** is currently employed at Philips® Ultrasound.

358 **Marta Bracco** was employed at Philips® Ultrasound.

359 **Stéphane Avril** is currently employed \*\*\*

360 **Ulver Lorenzen, Alexander Zielinski, and Magdalena Broda** have no relevant conflicts of interest.

361

362

363

364

365

366

367

368

369

370

371 **REFERENCES**

- 372 **1.** Lederle FA, Johnson GR, Wilson SE, Chute EP, Littooy FN, Bandyk D, et al. Prevalence and  
373 associations of abdominal aortic aneurysm detected through screening. *Aneurysm Detection and*  
374 *Management (ADAM) Veterans Affairs Cooperative Study Group. Ann Intern Med.*  
375 1997;126(6):441-9.
- 376 **2.** Lindholt JS, Sogaard R. Population screening and intervention for vascular disease in Danish  
377 men (VIVA): a randomised controlled trial. *Lancet.* 2017;390(10109):2256-65.
- 378 **3.** Johansson G, Nydahl S, Olofsson P, Swedenborg J. Survival in patients with abdominal aortic  
379 aneurysms. Comparison between operative and nonoperative management. *European journal of*  
380 *vascular surgery.* 1990;4(5):497-502.
- 381 **4.** Karbase Årsrapport [Internet]. 2017.
- 382 **5.** Aggarwal S, Qamar A, Sharma V, Sharma A. Abdominal aortic aneurysm: A comprehensive  
383 review. *Exp Clin Cardiol.* 2011;16(1):11-5.
- 384 **6.** Umebayashi R, Uchida HA, Wada J. Abdominal aortic aneurysm in aged population. *Aging*  
385 (Albany NY). 2018;10(12):3650-1.
- 386 **7.** Wanhainen A, Verzini F, Van Herzele I, Allaire E, Bown M, Cohnert T, et al. Editor's Choice -  
387 European Society for Vascular Surgery (ESVS) 2019 Clinical Practice Guidelines on the  
388 Management of Abdominal Aorto-iliac Artery Aneurysms. *Eur J Vasc Endovasc Surg.*  
389 2019;57(1):8-93.
- 390 **8.** Lederle FA, Wilson SE, Johnson GR, Reinke DB, Littooy FN, Acher CW, et al. Immediate repair  
391 compared with surveillance of small abdominal aortic aneurysms. *N Engl J Med.*  
392 2002;346(19):1437-44.
- 393 **9.** UK Small Aneurysms Trial Participants. Mortality results for randomised controlled trial of early  
394 elective surgery or ultrasonographic surveillance for small abdominal aortic aneurysms. The UK  
395 Small Aneurysm Trial Participants. *Lancet.* 1998;352(9141):1649-55.
- 396 **10.** Filardo G, Powell JT, Martinez MA, Ballard DJ. Surgery for small asymptomatic abdominal  
397 aortic aneurysms. *Cochrane Database Syst Rev.* 2015;2015(2):CD001835.
- 398 **11.** Lederle FA, Johnson GR, Wilson SE, Ballard DJ, Jordan WD, Jr., Blebea J, et al. Rupture rate  
399 of large abdominal aortic aneurysms in patients refusing or unfit for elective repair. *JAMA.*  
400 2002;287(22):2968-72.
- 401 **12.** Laine MT, Vanttinen T, Kantonen I, Halmesmaki K, Weselius EM, Laukontaus S, et al. Rupture  
402 of Abdominal Aortic Aneurysms in Patients Under Screening Age and Elective Repair Threshold.  
403 *Eur J Vasc Endovasc Surg.* 2016;51(4):511-6.

- 404 **13.** Lancaster EM, Gologorsky R, Hull MM, Okuhn S, Solomon MD, Avins AL, et al. The natural  
405 history of large abdominal aortic aneurysms in patients without timely repair. *J Vasc Surg.*  
406 2022;75(1):109-17.
- 407 **14.** Nicholls SC, Gardner JB, Meissner MH, Johansen HK. Rupture in small abdominal aortic  
408 aneurysms. *J Vasc Surg.* 1998;28(5):884-8.
- 409 **15.** Kontopodis N, Pantidis D, Dedes A, Daskalakis N, Ioannou CV. The - Not So - Solid 5.5 cm  
410 Threshold for Abdominal Aortic Aneurysm Repair: Facts, Misinterpretations, and Future  
411 Directions. *Front Surg.* 2016;3:1.
- 412 **16.** Oliver-Williams C, Sweeting MJ, Jacomelli J, Summers L, Stevenson A, Lees T, et al. Safety of  
413 Men With Small and Medium Abdominal Aortic Aneurysms Under Surveillance in the NAAASP.  
414 *Circulation.* 2019;139(11):1371-80.
- 415 **17.** Hanna L, Borsky K, Abdullah AA, Sounderajah V, Marshall DC, Saliccioli JD, et al. Trends in  
416 Hospital Admissions, Operative Approaches, and Mortality Related to Abdominal Aortic  
417 Aneurysms in England Between 1998 and 2020. *Eur J Vasc Endovasc Surg.* 2023;66(1):68-76.
- 418 **18.** Howard DP, Banerjee A, Fairhead JF, Handa A, Silver LE, Rothwell PM, et al. Population-  
419 Based Study of Incidence of Acute Abdominal Aortic Aneurysms With Projected Impact of  
420 Screening Strategy. *J Am Heart Assoc.* 2015;4(8):e001926.
- 421 **19.** Long A, Rouet L, Bissery A, Rossignol P, Mouradian D, Sapoval M. Compliance of abdominal  
422 aortic aneurysms evaluated by tissue Doppler imaging: correlation with aneurysm size. *Journal of*  
423 *vascular surgery.* 2005;42(1):18-26.
- 424 **20.** Wilson KA, Lee AJ, Lee AJ, Hoskins PR, Fowkes FG, Ruckley CV, et al. The relationship  
425 between aortic wall distensibility and rupture of infrarenal abdominal aortic aneurysm. *J Vasc Surg.*  
426 2003;37(1):112-7.
- 427 **21.** Wilson K, Bradbury A, Whyman M, Hoskins P, Lee A, Fowkes G, et al. Relationship between  
428 abdominal aortic aneurysm wall compliance and clinical outcome: a preliminary analysis. *Eur J*  
429 *Vasc Endovasc Surg.* 1998;15(6):472-7.
- 430 **22.** Sonesson B, Sandgren T, Lanne T. Abdominal aortic aneurysm wall mechanics and their  
431 relation to risk of rupture. *Eur J Vasc Endovasc Surg.* 1999;18(6):487-93.
- 432 **23.** Hoegh A, Lindholt JS. Vascular distensibility as a predictive tool in the management of small  
433 asymptomatic abdominal aortic aneurysms. *Vasc Endovascular Surg.* 2009;43(4):333-8.
- 434 **24.** Lorenzen US, Eiberg JP, Hultgren R, Wanhainen A, Langenskiold M, Sillesen HH, et al. The  
435 Short-term Predictive Value of Vessel Wall Stiffness on Abdominal Aortic Aneurysm Growth. *Ann*  
436 *Vasc Surg.* 2021;77:187-94.

- 437 **25.** Di Martino ES, Bohra A, Vande Geest JP, Gupta N, Makaroun MS, Vorp DA. Biomechanical  
438 properties of ruptured versus electively repaired abdominal aortic aneurysm wall tissue. *J Vasc*  
439 *Surg.* 2006;43(3):570-6; discussion 6.
- 440 **26.** Bracco MI, Broda M, Lorenzen US, Florkow MC, Somphone O, Avril S, et al. Fast strain  
441 mapping in abdominal aortic aneurysm wall reveals heterogeneous patterns. *Front Physiol.*  
442 2023;14:1163204.
- 443 **27.** Zottola ZR, Kong DS, Medhekar AN, Frye LE, Hao SB, Gonring DW, et al. Intermediate  
444 pressure-normalized principal wall strain values are associated with increased abdominal aortic  
445 aneurysmal growth rates. *Front Cardiovasc Med.* 2023;10:1232844.
- 446 **28.** Derwich W, Keller T, Filmann N, Schmitz-Rixen T, Blase C, Oikonomou K, et al. Changes in  
447 Aortic Diameter and Wall Strain in Progressing Abdominal Aortic Aneurysms. *J Ultrasound Med.*  
448 2023;42(8):1737-46.
- 449 **29.** Derwich W, Wittek A, Pfister K, Nelson K, Bereiter-Hahn J, Fritzen CP, et al. High Resolution  
450 Strain Analysis Comparing Aorta and Abdominal Aortic Aneurysm with Real Time Three  
451 Dimensional Speckle Tracking Ultrasound. *Eur J Vasc Endovasc Surg.* 2016;51(2):187-93.
- 452 **30.** Karatolios K, Wittek A, Nwe TH, Bihari P, Shelke A, Josef D, et al. Method for aortic wall  
453 strain measurement with three-dimensional ultrasound speckle tracking and fitted finite element  
454 analysis. *Ann Thorac Surg.* 2013;96(5):1664-71.
- 455 **31.** van Disseldorp EM, Petterson NJ, Rutten MC, van de Vosse FN, van Sambeek MR, Lopata RG.  
456 Patient Specific Wall Stress Analysis and Mechanical Characterization of Abdominal Aortic  
457 Aneurysms Using 4D Ultrasound. *Eur J Vasc Endovasc Surg.* 2016;52(5):635-42.
- 458 **32.** van Disseldorp EMJ, Petterson NJ, van de Vosse FN, van Sambeek M, Lopata RGP.  
459 Quantification of aortic stiffness and wall stress in healthy volunteers and abdominal aortic  
460 aneurysm patients using time-resolved 3D ultrasound: a comparison study. *Eur Heart J Cardiovasc*  
461 *Imaging.* 2019;20(2):185-91.
- 462 **33.** Broda M, Rouet L, Zielinski A, Sillesen H, Eiberg J, Ghulam Q. Profiling abdominal aortic  
463 aneurysm growth with three-dimensional ultrasound. *Int Angiol.* 2022;41(1):33-40.
- 464 **34.** Ullah S, Finch CF. Applications of functional data analysis: A systematic review. *BMC Medical*  
465 *Research Methodology.* 2013;13(1):43.
- 466 **35.** Mukaka MM. Statistics corner: A guide to appropriate use of correlation coefficient in medical  
467 research. *Malawi Med J.* 2012;24(3):69-71.
- 468 **36.** John CR, Watson D, Russ D, Goldmann K, Ehrenstein M, Pitzalis C, et al. M3C: Monte Carlo  
469 reference-based consensus clustering. *Scientific Reports.* 2020;10(1):1816.



- 470 **37.** John CR, Watson D, Barnes MR, Pitzalis C, Lewis MJ. Spectrum: fast density-aware spectral  
471 clustering for single and multi-omic data. *Bioinformatics*. 2020;36(4):1159-66.
- 472 **38.** Bracco MI, Eiberg JP, Lorenzen US, Avril S, Rouet L. Aortic Wall Stiffness Depends on  
473 Ultrasound Probe Pressure. 2023.
- 474 **39.** Svendsen MBS, Ghulam QM, Zielinski AH, Lachenmeier C, Eiberg JP. Validation of an  
475 assessment tool for estimation of abdominal aortic aneurysm compression in diagnostic ultrasound.  
476 *Ultrasonics*. 2021;116:106484.
- 477 **40.** Ghulam QM, Svendsen MBS, Zielinski AH, Eiberg JP. Ultrasound Transducer Pressure: An  
478 Unexplored Source of Abdominal Aortic Aneurysm Measurement Error. *Ultrasound Med Biol*.  
479 2022;48(9):1778-84.  
480

## LEGENDS TO TABLES AND FIGURES

**Table 1:** Demographics table.

SD = standard deviation. N = patients with demographics data. NYHA = New York Heart Association score.

**Table 2:** Frequency-weighted medians and interquartile ranges (IQR) along with Spearman's rank correlation with abdominal aortic aneurysm (AAA) size for each of the principal strain single parameter characterisations.

PPPS = pulse pressure-normalised mean principal strain,  $\rho$  = Spearman's  $\rho$ , P = P-value, FDR-P = false discovery rate-corrected P-value (FDR-P).

**Table 3:** Inter-reader and inter-operator reproducibility for principal strain single parameter characterisations, denoted by range of variance (RoV) and limits of agreement (LoA) from the quantile-based Bland-Altman statistics and the linear mixed-effects model, respectively.

Both RoV and LoA are shown as absolute values (percentage of median).

**Figure 1:** Overview of procedure for strain pattern generation. The steps are: A) acquisition of a 10-second cine loop; B) manual segmentation, placing tracking points along the AAA wall/lumen border; C) automatic speckle tracking; D) generation of strain map; E) extrapolation of strain values to a circle; and F) plotting the strain pattern in a polar plot.

**Figure 2:** Polar plots illustrating aligned mean principal strain across all cine loops. Larger values indicate softer tissues and smaller values indicate stiffer tissues. The averages are shown comparing operators.

**Figure 3:** Polar plots of the principal mode of variation (PMV) with the most negative correlation (PMV #2) and of the PMV with the most positive correlation (PMV #8) to abdominal aortic aneurysm (AAA) size. These are placed next to a scatterplot of the PMV score as a function of AAA size with a simple linear trend line for clarity.

**Figure 4:** The mean principal strain patterns split into two clusters by the expectation-maximisation clustering algorithm. Note scale difference compared to Figure 2.

## TABLES

**Table 1:** Demographics table.

SD = standard deviation. N = patients with demographics data. NYHA = New York Heart Association score.

|                                            | Overall (N=47) |
|--------------------------------------------|----------------|
| <b>Sex</b>                                 |                |
| Female                                     | 9 (19 %)       |
| Male                                       | 38 (81 %)      |
| <b>Age (years)</b>                         |                |
| Mean (SD)                                  | 73 (4.7)       |
| <b>Height (m)*</b>                         |                |
| Mean (SD)                                  | 1.8 (0.075)    |
| <b>Weight (kg)*</b>                        |                |
| Mean (SD)                                  | 85 (17)        |
| <b>Body mass index (kg/m<sup>2</sup>)*</b> |                |
| Mean (SD)                                  | 27 (4.7)       |
| <b>Hypertension</b>                        |                |
| No                                         | 14 (30 %)      |
| Yes                                        | 33 (70 %)      |
| <b>Ischaemic heart disease</b>             |                |
| No                                         | 40 (85 %)      |
| Yes                                        | 7 (15 %)       |
| <b>NYHA</b>                                |                |
| None                                       | 5 (11 %)       |
| I                                          | 39 (83 %)      |
| II                                         | 2 (4 %)        |
| III                                        | 1 (2 %)        |
| IV                                         | 0 (0 %)        |
| <b>Blood thinner</b>                       |                |
| None                                       | 7 (15 %)       |
| Platelet inhibitor                         | 36 (77 %)      |
| Anticoagulant                              | 3 (6 %)        |
| Dual-pathway inhibition                    | 1 (2 %)        |
| <b>Cholesterol lowering</b>                |                |
| No                                         | 8 (17 %)       |
| Yes                                        | 39 (83 %)      |
| <b>Smoking*</b>                            |                |
| Never                                      | 2 (4 %)        |
| Past                                       | 24 (51 %)      |
| Current                                    | 20 (43 %)      |
| <b>Diabetes*</b>                           |                |
| No                                         | 37 (79 %)      |
| Yes                                        | 9 (19 %)       |
| <b>Pulmonary disease</b>                   |                |
| None                                       | 39 (83 %)      |
| Obstructive                                | 7 (15 %)       |
| Restrictive                                | 1 (2 %)        |

\*Further n = 1 missing.

**Table 2:** Correlations between abdominal aortic aneurysm (AAA) size and each of the principal strain pattern principal modes of variation (PMV) from the functional principal component analysis.  $\rho$  = Spearman's  $\rho$ , P = P-value, FDR-P = false discovery rate-corrected P-value. Statistically significant FDR-P is marked with \*.

| PMV | Correlation to AAA size |        |         |
|-----|-------------------------|--------|---------|
|     | $\rho$                  | P      | FDR-P   |
| #1  | -0.02                   | 0.78   | 0.78    |
| #2  | -0.24                   | 0.001  | 0.005*  |
| #3  | 0.13                    | 0.07   | 0.15    |
| #4  | -0.20                   | 0.008  | 0.02*   |
| #5  | -0.09                   | 0.20   | 0.33    |
| #6  | 0.07                    | 0.35   | 0.46    |
| #7  | -0.05                   | 0.54   | 0.62    |
| #8  | 0.29                    | <0.001 | <0.001* |

**Table 3:** Frequency-weighted medians and interquartile ranges (IQR) along with Spearman’s rank correlation with abdominal aortic aneurysm (AAA) size for each of the principal strain single parameter characterisations.

PPPS = pulse pressure-normalised mean principal strain,  $\rho$  = Spearman’s  $\rho$ , P = P-value, FDR-P = false discovery rate-corrected P-value.

| Parameter           | Overview |                  | Correlation to AAA size |      |       |
|---------------------|----------|------------------|-------------------------|------|-------|
|                     | Median   | IQR              | $\rho$                  | P    | FDR-P |
| Mean strain (%)     | 2.1      | (1.7 to 2.6)     | -0.02                   | 0.80 | 0.94  |
| PPPS (%/mmHg)       | 0.038    | (0.029 to 0.051) | 0.09                    | 0.22 | 0.94  |
| Peak strain (%)     | 4.6      | (3.4 to 6.1)     | 0.01                    | 0.94 | 0.94  |
| Heterogeneity index | 0.54     | (0.44 to 0.65)   | 0.02                    | 0.76 | 0.94  |
| Local strain ratio  | 2.1      | (1.8 to 2.4)     | 0.06                    | 0.41 | 0.94  |

**Table 4:** Inter-reader and inter-operator reproducibility for principal strain single parameter characterisations, denoted by range of variance (RoV) and limits of agreement (LoA) from the quantile-based Bland-Altman statistics and the linear mixed-effects model, respectively. Both RoV and LoA are shown as absolute values (percentage of median).

| Parameters          | Inter-reader | Inter-operator |
|---------------------|--------------|----------------|
|                     | RoV          | LoA            |
| Mean strain (%)     | 0.33 (16 %)  | 1.4 (69 %)     |
| PPPS (%/mmHg)       | 0.007 (20 %) | 0.031 (82 %)   |
| Peak strain (%)     | 0.99 (22 %)  | 3.7 (81 %)     |
| Heterogeneity index | 0.099 (19 %) | 0.43 (82 %)    |
| Local strain ratio  | 0.29 (14 %)  | 1.2 (55 %)     |

## FIGURES

**Figure 1:** Overview of procedure for strain pattern generation. The steps are: A) acquisition of a 10-second cine loop; B) manual segmentation, placing tracking points along the AAA wall/lumen border; C) automatic speckle tracking; D) generation of strain map; E) extrapolation of strain values to a circle; and F) plotting the strain pattern in a polar plot.

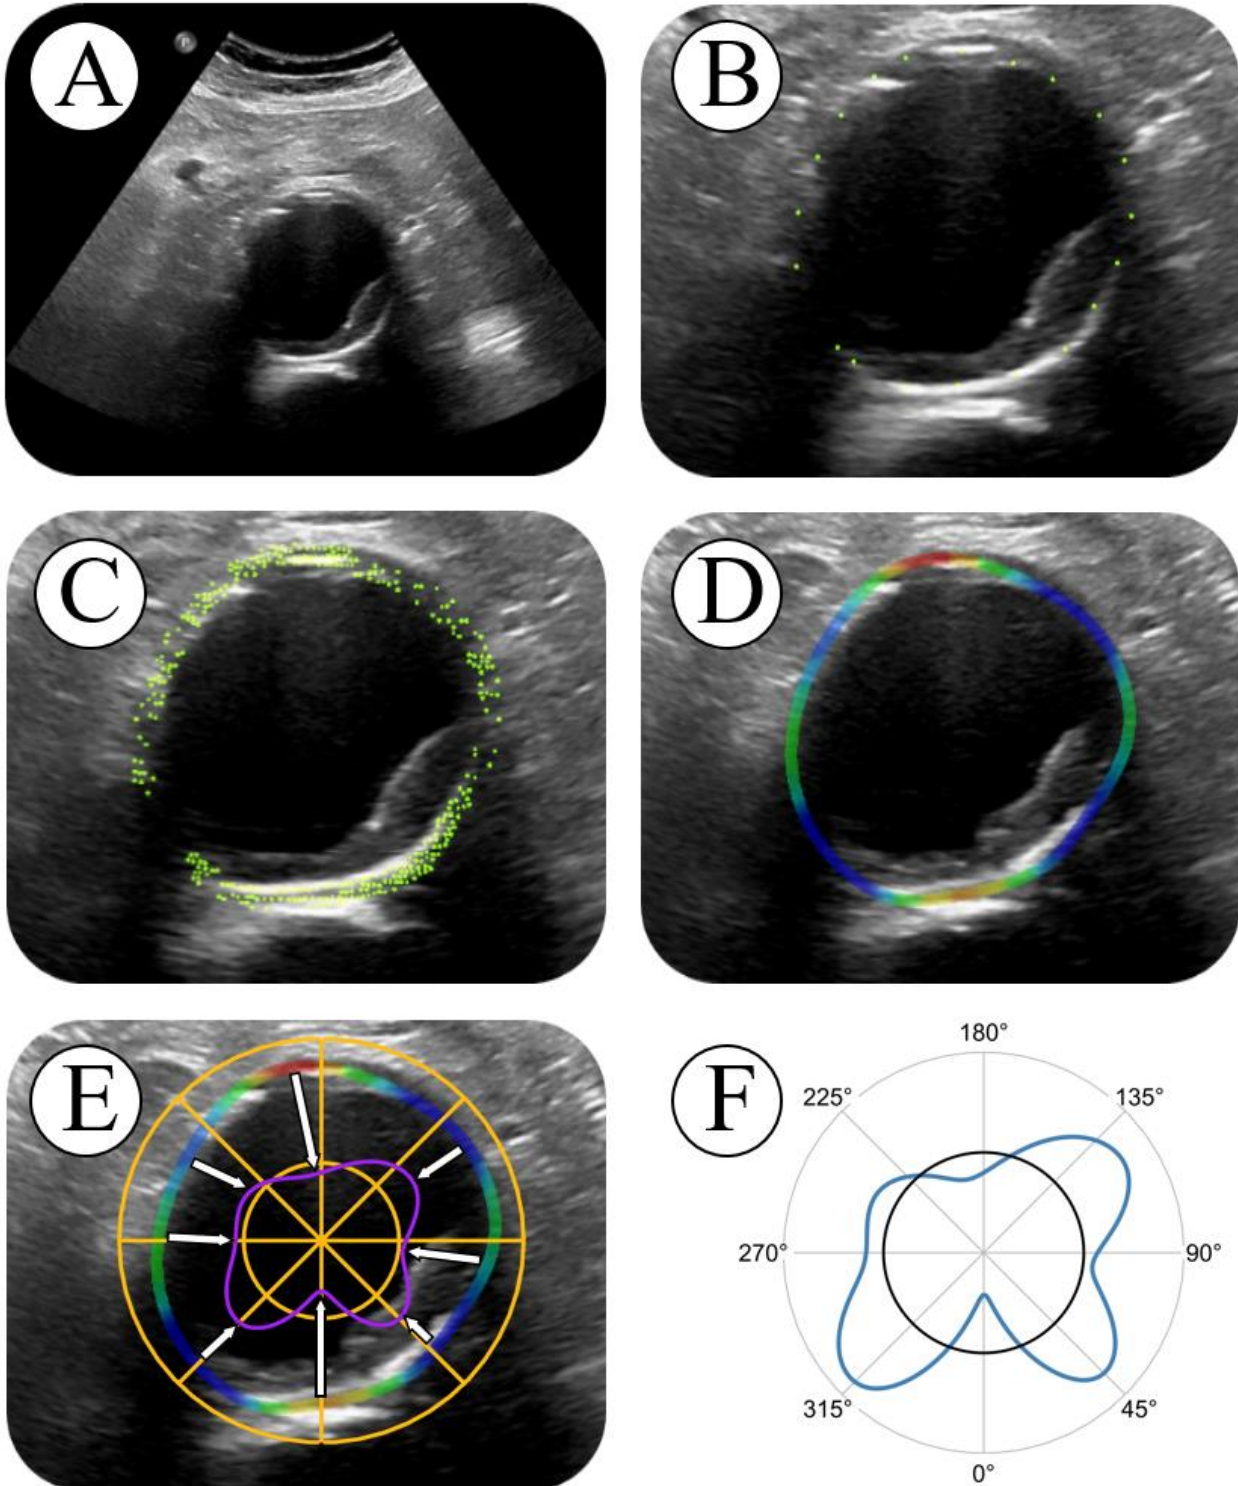



**Figure 2:** Polar plots illustrating aligned mean principal strain patterns across all cineloops from all patients. Larger values indicate softer tissues and smaller values indicate stiffer tissues. The averages are shown comparing operators.

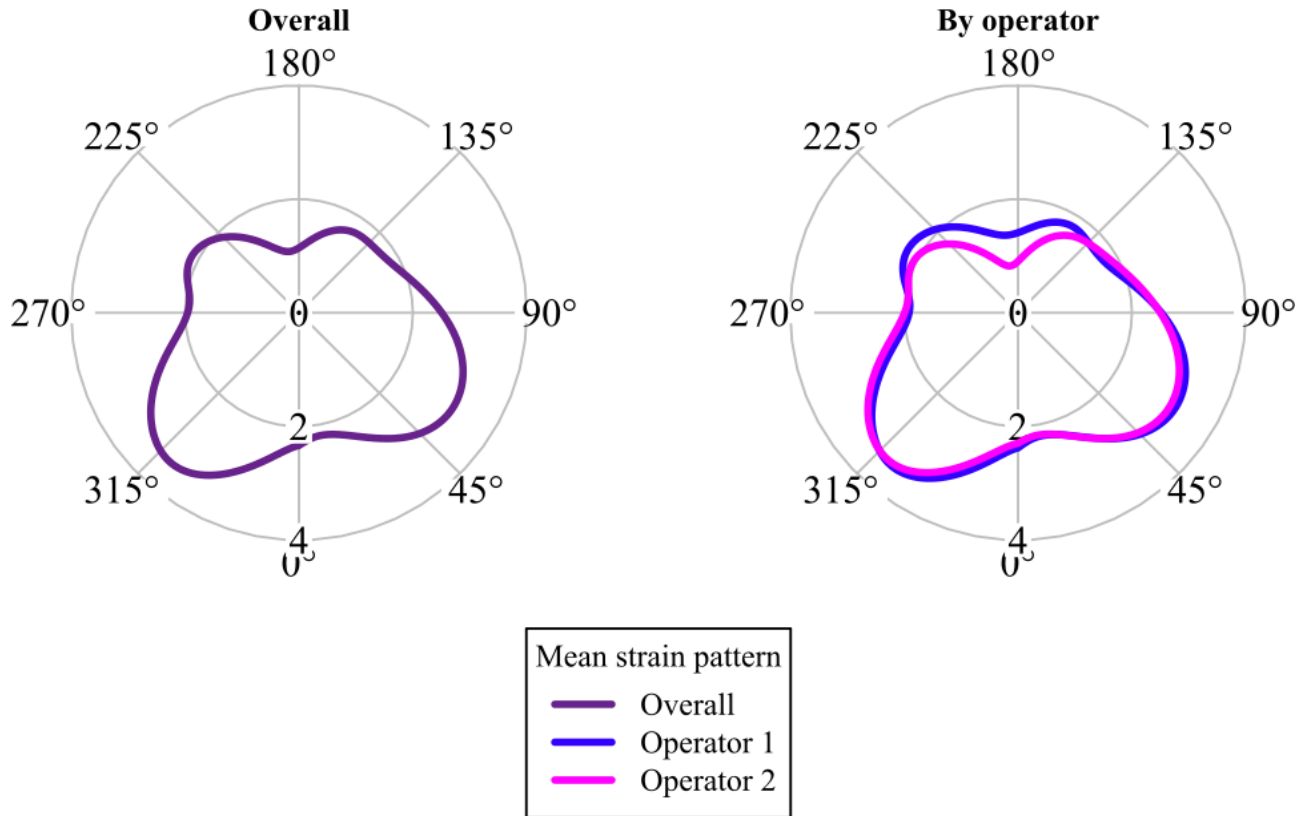

**Figure 3:** Polar plots of the principal mode of variation (PMV) with the most negative correlation (PMV #2) and of the PMV with the most positive correlation (PMV #8) to abdominal aortic aneurysm (AAA) size. These are placed next to a scatterplot of the PMV score as a function of AAA size with a simple linear trend line for clarity.

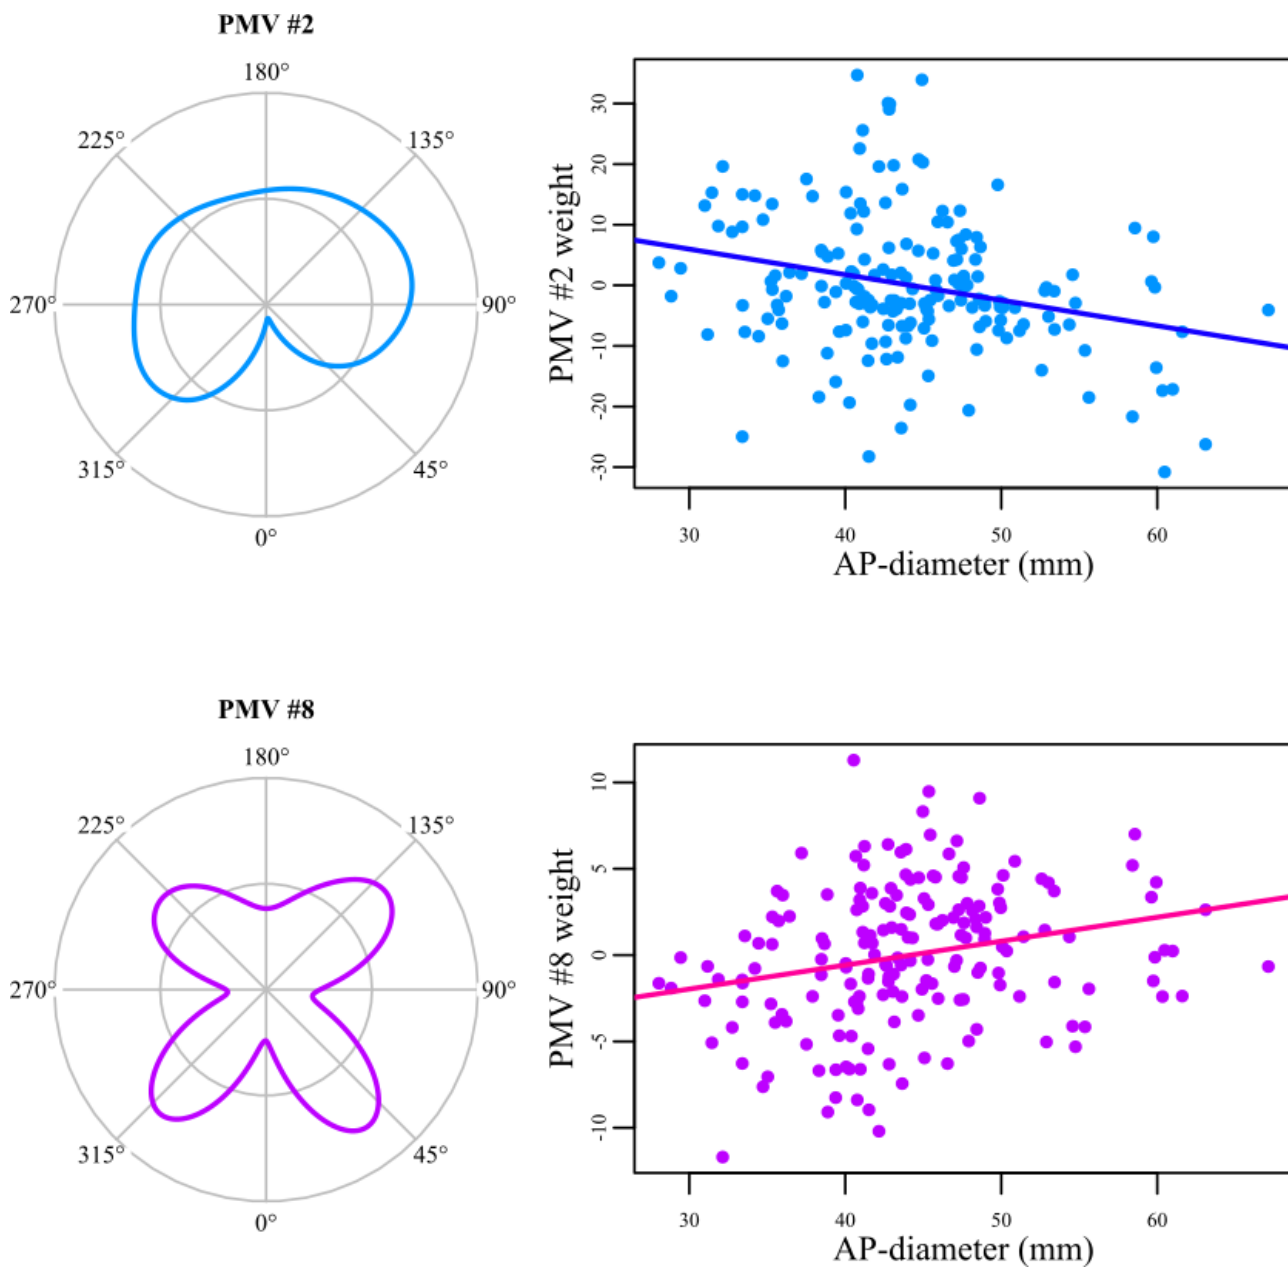

**Figure 4:** The mean principal strain patterns split into two clusters by spectral consensus clustering. Note scale difference compared to Figure 2.

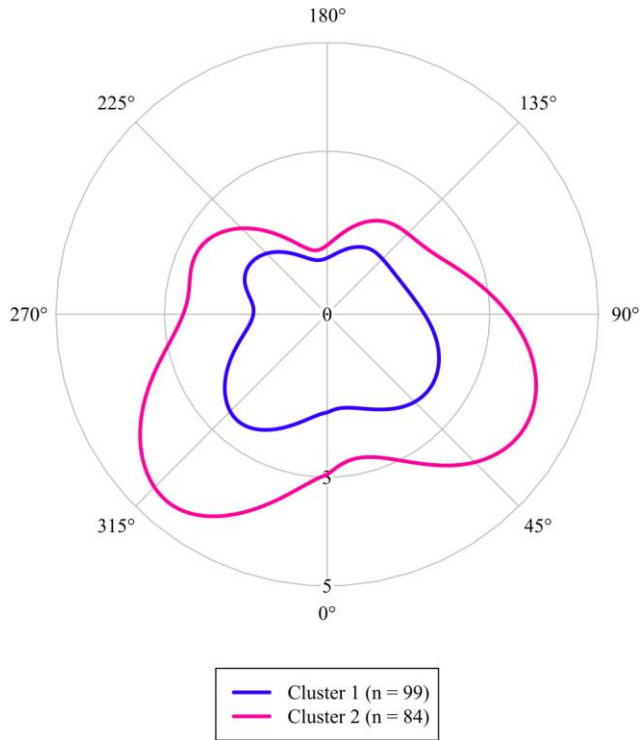

## SUPPLEMENTARY MATERIALS

**Table S1:** Local extrema describing the aligned mean curves for the principal, circumferential, and radial strains.

| Principal strain |            | Circumferential strain |            | Radial strain |            |
|------------------|------------|------------------------|------------|---------------|------------|
| Position (°)     | Strain (%) | Position (°)           | Strain (%) | Position (°)  | Strain (%) |
| 12               | Min: 2.2   | 9                      | Min: -0.9  | 9             | Max: 0.3   |
| 60               | Max: 3.2   | 70                     | Max: 2.1   | 55            | Min: -0.6  |
| 189              | Min: 1.1   | 128                    | Min: 0.5   | 104           | Max: 0.3   |
| 244              | Max: 2.1   | 152                    | Max: 0.7   | 177           | Min: -1.3  |
| 266              | Min: 1.9   | 191                    | Min: 0.0   | 274           | Max: 0.4   |
| 320              | Max: 3.5   | 238                    | Max: 1.3   | 321           | Min: -0.9  |
|                  |            | 271                    | Min: 0.4   |               |            |
|                  |            | 315                    | Max: 2.5   |               |            |

**Table S2:** Correlations between abdominal aortic aneurysm (AAA) size and each of the circumferential and radial strain pattern principal modes of variation (PMV) from the functional principal component analysis.

$\rho$  = Spearman's  $\rho$ , P = P-value, FDR-P = false discovery rate-corrected P-value. Statistically significant FDR-P is marked with \*.

| PMV                    | Correlation to AAA size |       |        |
|------------------------|-------------------------|-------|--------|
|                        | $\rho$                  | P     | FDR-P  |
| Circumferential strain |                         |       |        |
| #1                     | -0.15                   | 0.05  | 0.07   |
| #2                     | 0.21                    | 0.004 | 0.01*  |
| #3                     | -0.12                   | 0.11  | 0.14   |
| #4                     | 0.19                    | 0.01  | 0.03*  |
| #5                     | -0.11                   | 0.12  | 0.14   |
| #6                     | 0.05                    | 0.50  | 0.50   |
| #7                     | 0.23                    | 0.002 | 0.01*  |
| #8                     | 0.16                    | 0.03  | 0.06   |
| Radial strain          |                         |       |        |
| #1                     | -0.03                   | 0.64  | 0.64   |
| #2                     | 0.07                    | 0.36  | 0.48   |
| #3                     | 0.06                    | 0.40  | 0.48   |
| #4                     | 0.24                    | 0.001 | 0.007* |
| #5                     | 0.10                    | 0.18  | 0.36   |
| #6                     | 0.10                    | 0.17  | 0.36   |

**Table S3:** Frequency-weighted medians and interquartile ranges (IQR) along with Spearman's rank correlation with abdominal aortic aneurysm (AAA) size for each of the principal strain single parameter characterisations. The pulse pressure- normalised mean strains are denoted 'PP' and are similar to the pulse pressure-corrected mean principal strains, PPPS, in the paper.

$\rho$  = Spearman's  $\rho$ , P = P-value, FDR-P = false discovery rate-corrected P-value (FDR-P).

| Parameter              | Overview |                   | Correlation to AAA size |      |       |
|------------------------|----------|-------------------|-------------------------|------|-------|
|                        | Median   | IQR               | $\rho$                  | P    | FDR-P |
| Circumferential strain |          |                   |                         |      |       |
| Mean strain (%)        | 0.78     | (0.50 to 1.1)     | -0.05                   | 0.50 | 0.96  |
| PP (%/mmHg)            | 0.013    | (0.009 to 0.019)  | 0.02                    | 0.83 | 0.96  |
| Peak strain (%)        | 3.5      | (2.6 to 4.9)      | 0.00                    | 0.96 | 0.96  |
| Heterogeneity index    | 1.7      | (1.1 to 2.7)      | 0.01                    | 0.90 | 0.96  |
| Local strain ratio     | 4.6      | (3.3 to 7.2)      | 0.04                    | 0.63 | 0.96  |
| Radial strain          |          |                   |                         |      |       |
| Mean strain (%)        | -0.30    | (-0.71 to 0.098)  | -0.04                   | 0.59 | 0.69  |
| PP (%/mmHg)            | -0.005   | (-0.012 to 0.002) | -0.05                   | 0.50 | 0.69  |
| Peak strain (%)        | 2.2      | (1.3 to 3.4)      | -0.03                   | 0.71 | 0.71  |
| Heterogeneity index    | -1.5     | (-3.4 to 1.9)     | -0.11                   | 0.15 | 0.51  |
| Local strain ratio     | -1.7     | (-5.0 to 4.5)     | -0.10                   | 0.19 | 0.51  |

**Table S4:** Inter-reader and inter-operator reproducibility for circumferential and radial strain single parameter characterisations, denoted by range of variance (RoV) and limits of agreement (LoA) from the quantile-based Bland-Altman statistics and the linear mixed-effects model, respectively. Both RoV and LoA are shown as absolute values (percentage of median).

| Parameters             | Inter-reader  | Inter-operator |
|------------------------|---------------|----------------|
|                        | RoV           | LoA            |
| Circumferential strain |               |                |
| Mean strain (%)        | 0.20 (26 %)   | 1.0 (128 %)    |
| PP (%/mmHg)            | 0.004 (29 %)  | 0.021 (152 %)  |
| Peak strain (%)        | 0.92 (27 %)   | 3.4 (97 %)     |
| Heterogeneity index    | 4.1 (226 %)   | 13 (703 %)     |
| Local strain ratio     | 8.3 (182 %)   | 23 (503 %)     |
| Radial strain          |               |                |
| Mean strain (%)        | 0.40 (129 %)  | 1.9 (621 %)    |
| PP (%/mmHg)            | 0.008 (149 %) | 0.038 (711 %)  |
| Peak strain (%)        | 1.1 (48 %)    | 3.5 (152 %)    |
| Heterogeneity index    | 42 (2663 %)   | 45 (2861 %)    |
| Local strain ratio     | 72 (4102 %)   | 81 (4650 %)    |

**Figure S1:** Overview of circumferential and radial strain types with a sample strain map in the centre. Circumferential strain is defined as compression or stretch along the circumference of the AAA vessel wall. Radial strain is thinning or thickening of the vessel wall and surrounding tissue. Both types of strain are visualised in the same manner: zero strain is green, positive strain (stretch) is blue, and negative strain (compression) is red.

### Circumferential strain

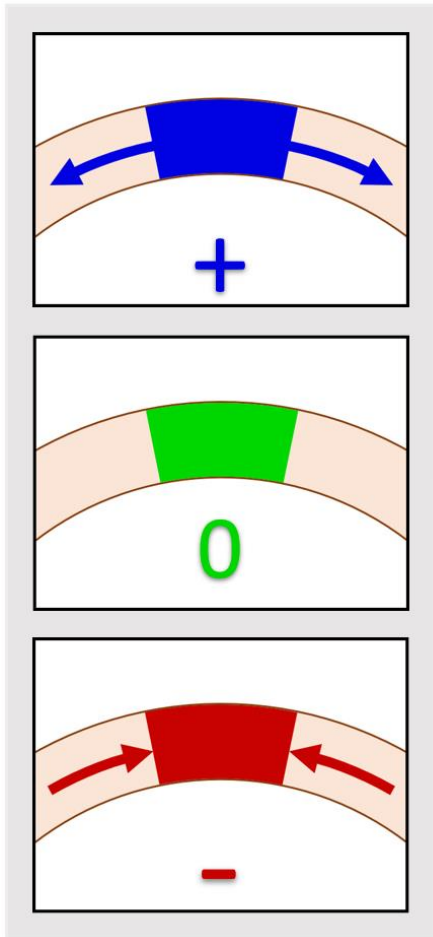

### Radial strain

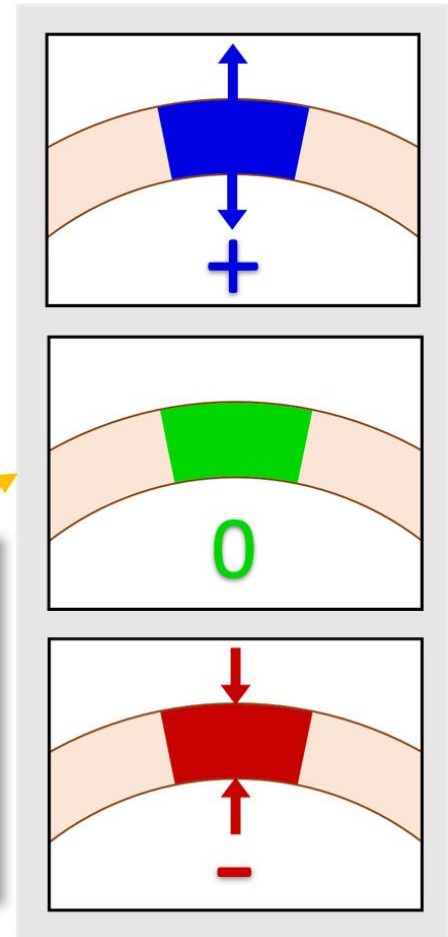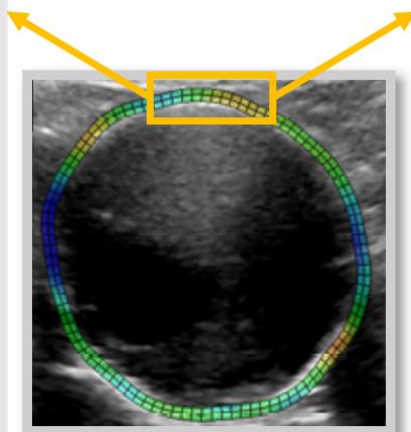

**Figure S2:** Polar plots illustrating mean circumferential and radial strain across all cine-loops. For circumferential and radial strain, respectively, positive values indicate stretching or thickening of the AAA vessel wall, and negative values indicate compression or thinning. The averages are shown comparing operators.

### Circumferential strain

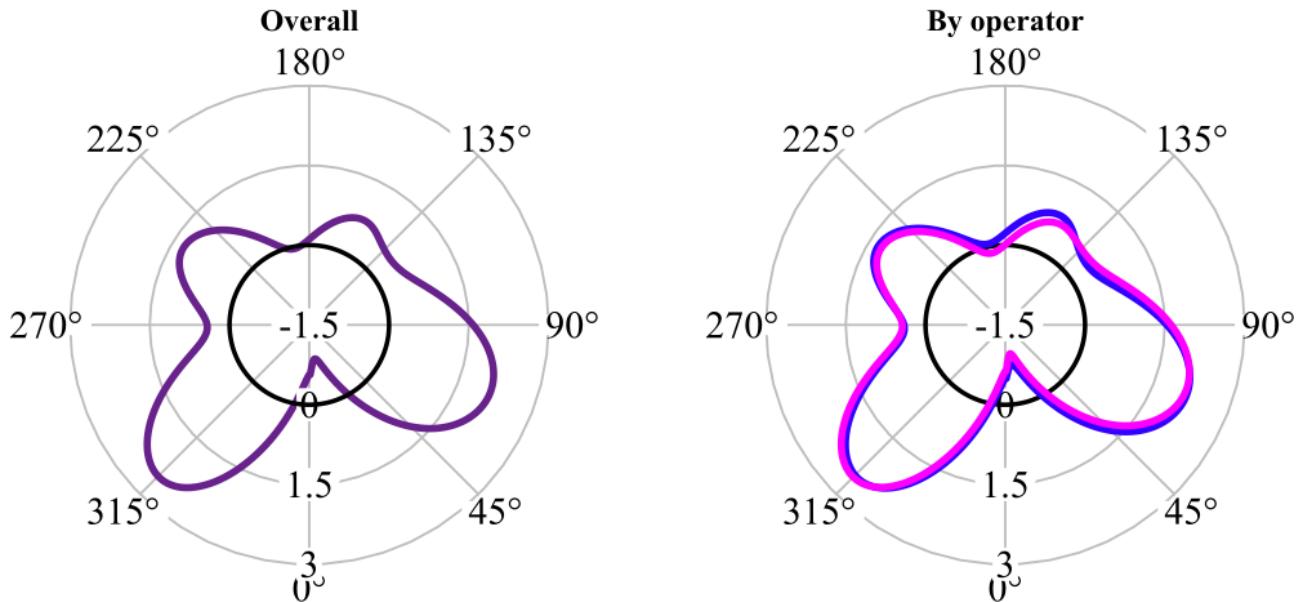

### Radial strain

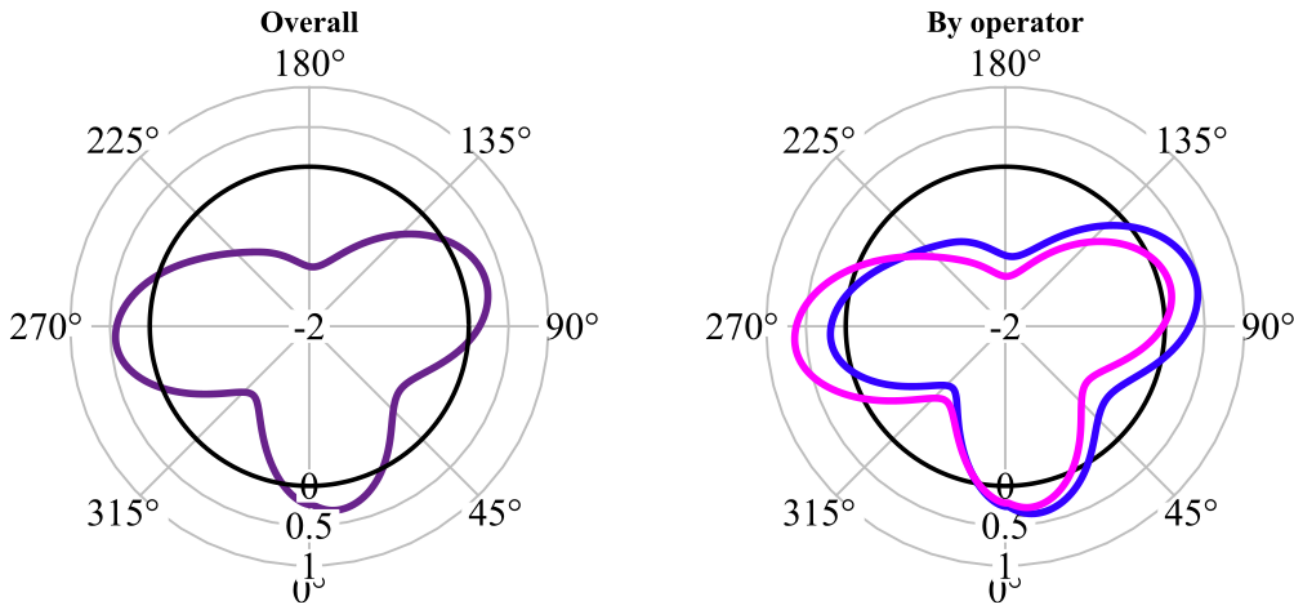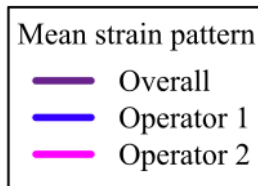

**Figure S3:** Polar plots of the all principal modes of variation (PMVs) derived from the functional principal component analysis of principal, circumferential, and radial strain. The purple lines show the mean strain pattern, and the pink areas show the mean plus  $10 \cdot \text{PMV}$ .

### Principal strain

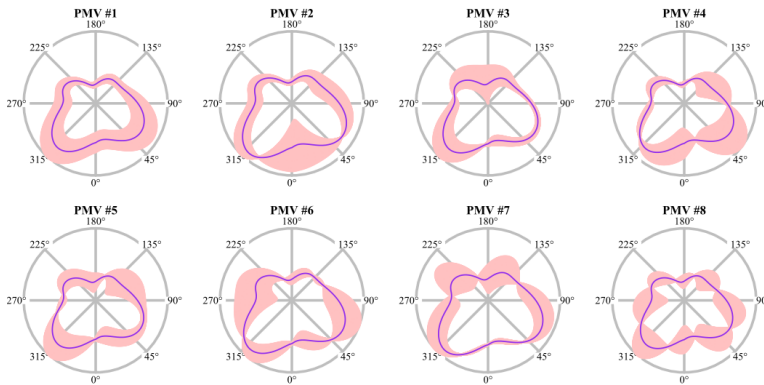

### Circumferential strain

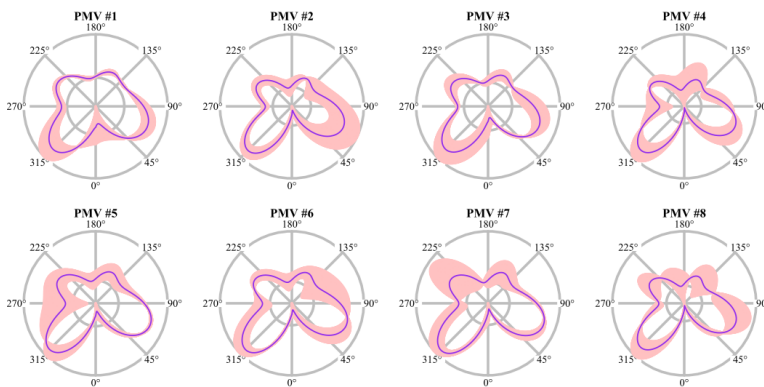

### Radial strain

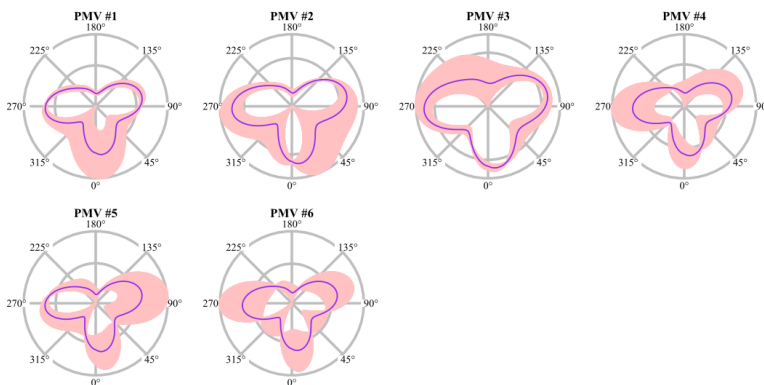



**Figure S4:** The mean circumferential and radial strain patterns each split into two clusters by the spectral consensus clustering algorithm.

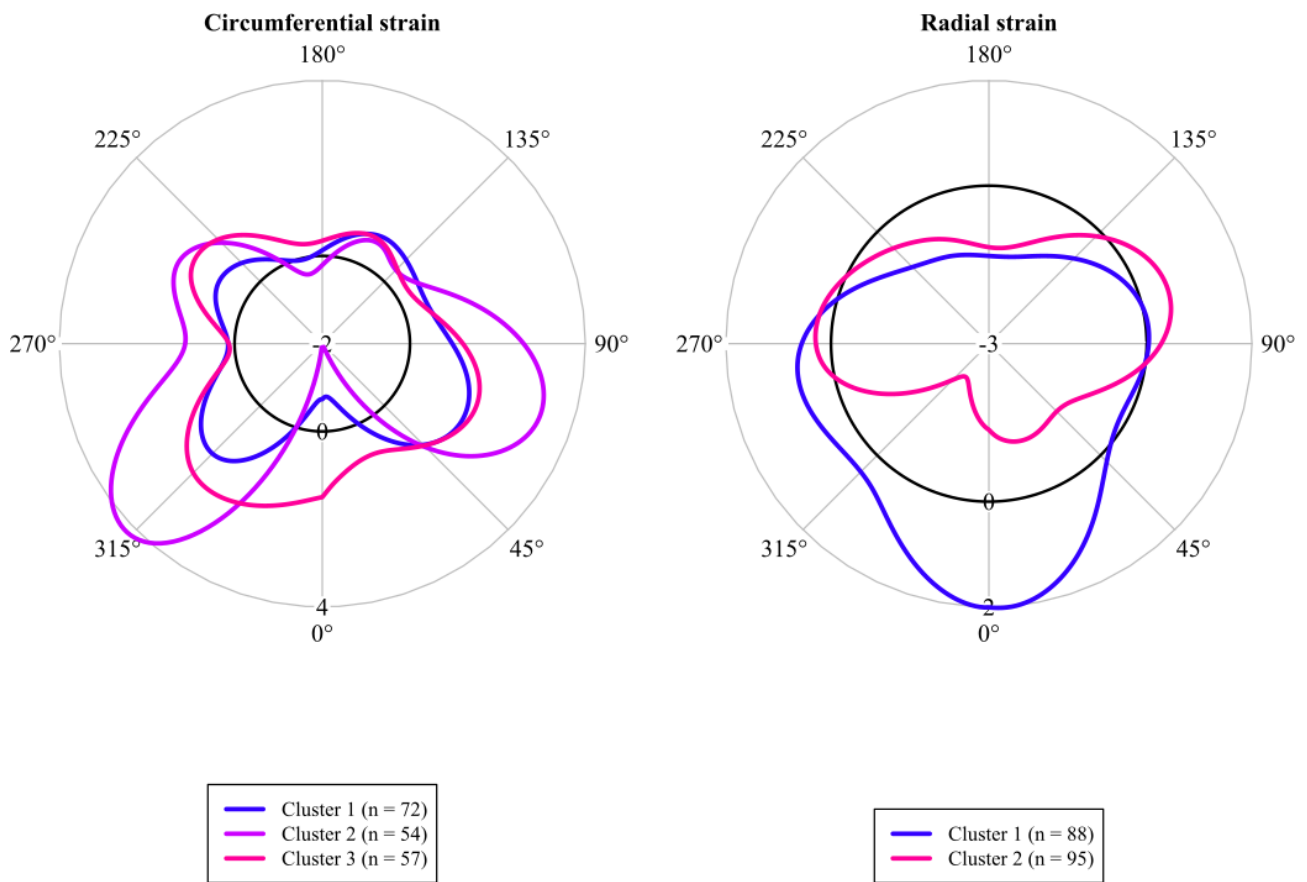

**Figure S5:** Distribution of patient cluster reproducibilities measured by the percentage of a patient's cineloops belonging to the same cluster.

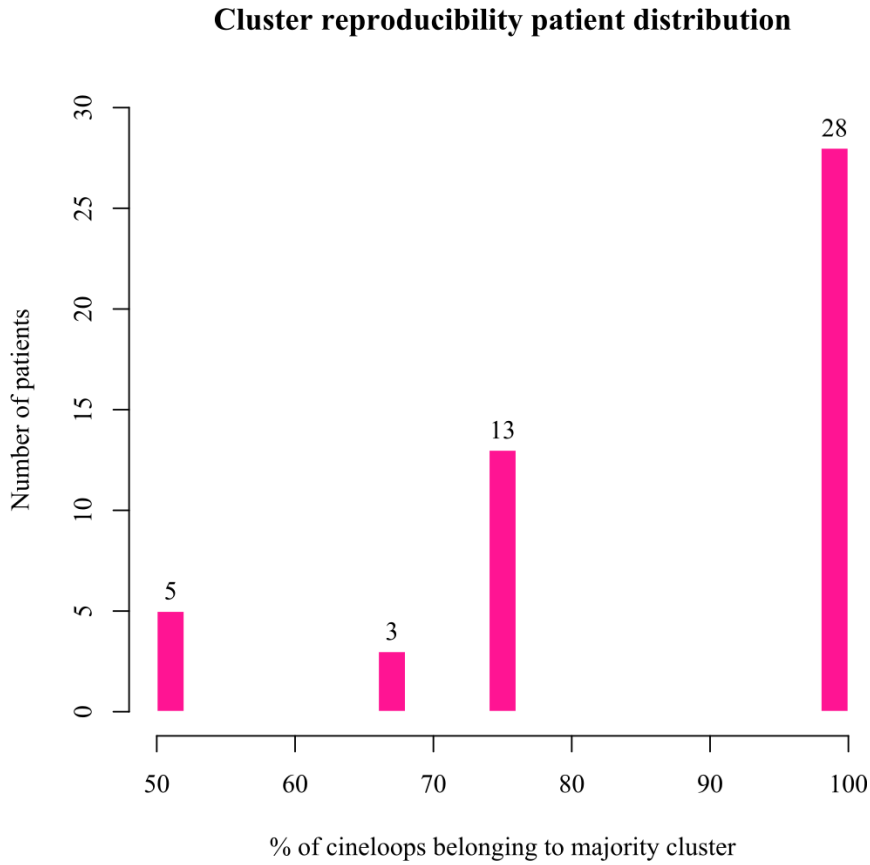

**Figure S6:** Strain patterns extracted from cineloops acquired on the same patients. Examples are chosen purely to illustrate how phases can vary little compared to the amplitude variation. Note, while each polar plot depicts strain patterns from the same patient, the principal, circumferential, and radial strain pattern polar plots are from different patients. These curves represent the smoothed strain patterns, before any alignment.

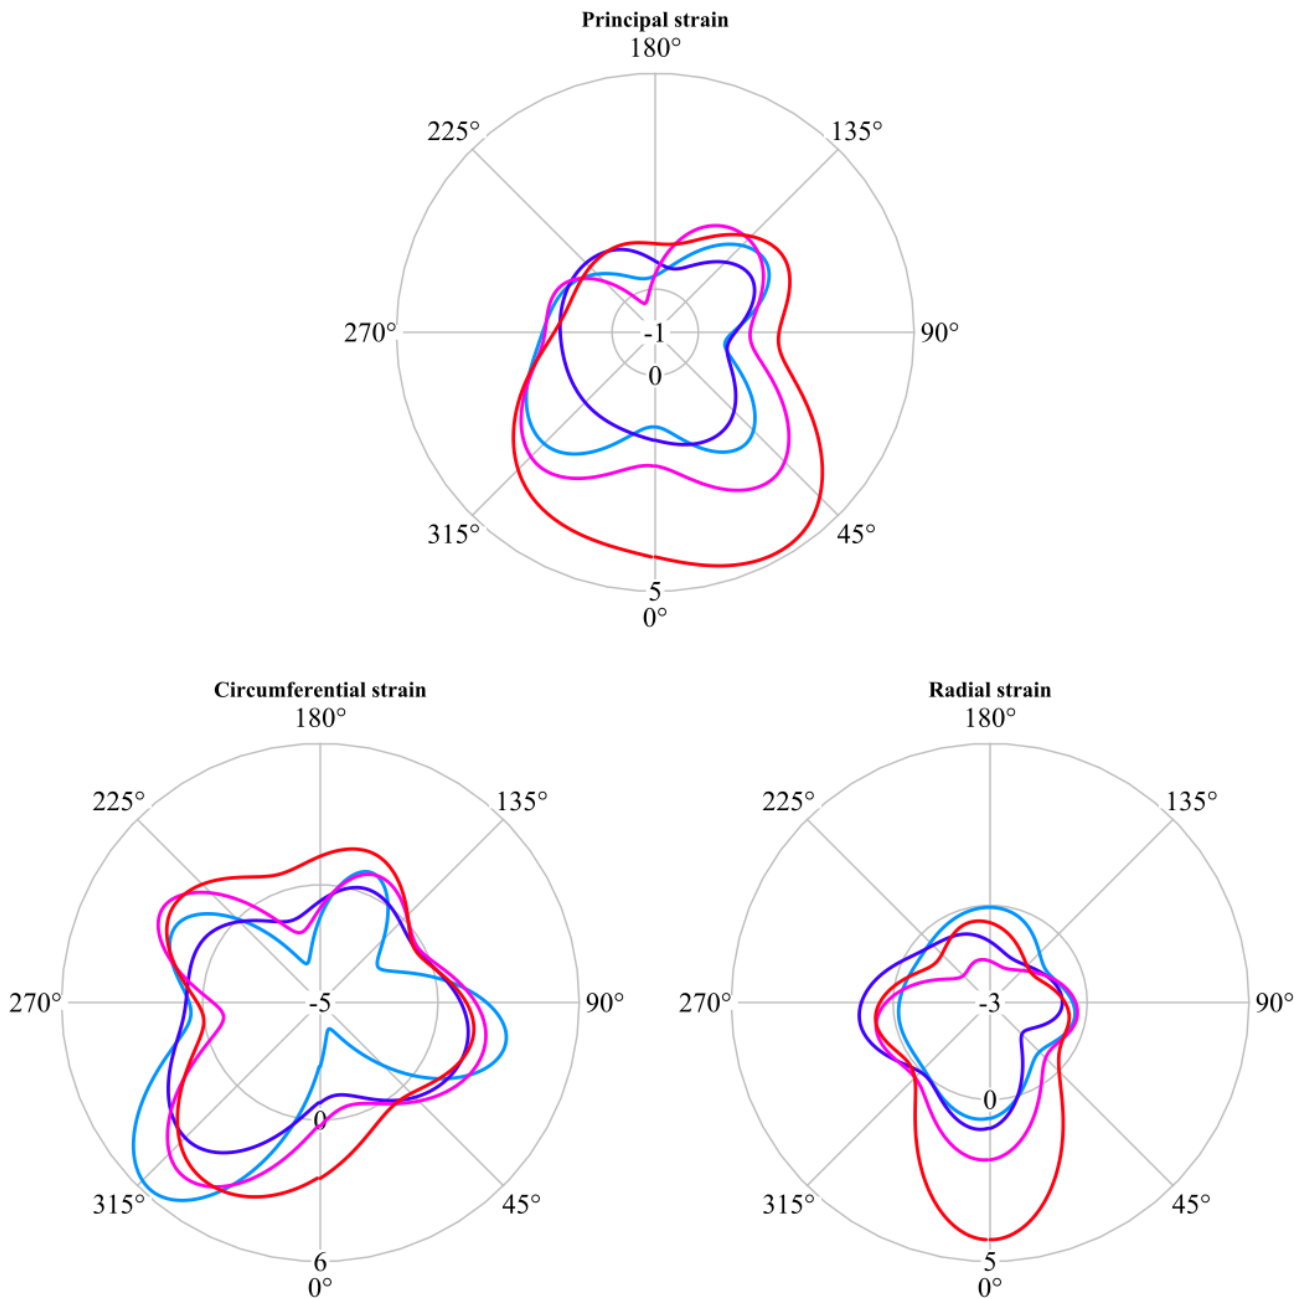

Source: https://medrxiv.org/content/medrxiv/early/2024/05/27/2024.05.27.24307963.full.pdf
